# Supplementary material for: Temperature effects on the viscosity and the wavelength-dependent refractive index of imidazolium-based ionic liquids with a phosphorus-containing anion
Source: Royal Society of Chemistry journal article supplement (doi:10.1039/c6cp08910k), 2017-01-01
Supplement: c6cp08910k1.pdf [file c6cp08910k1.pdf]

| Temperature (°C) | Measured refractive index for [C <sub>1</sub> C <sub>1</sub> im][(MeO) <sub>2</sub> PO <sub>2</sub> ] |        |         |        |        |
|------------------|-------------------------------------------------------------------------------------------------------|--------|---------|--------|--------|
|                  | 450nm                                                                                                 | 532nm  | 632.8nm | 964nm  | 1551nm |
| 160              | 1.4652                                                                                                | 1.4578 | 1.4534  | 1.4458 | 1.4422 |
| 150              | 1.4669                                                                                                | 1.4596 | 1.4552  | 1.4483 | 1.4443 |
| 140              | 1.4688                                                                                                | 1.4606 | 1.4569  | 1.4493 | 1.4445 |
| 130              | 1.4698                                                                                                | 1.4625 | 1.4583  | 1.4507 | 1.4464 |
| 120              | 1.4709                                                                                                | 1.4641 | 1.4594  | 1.4517 | 1.4473 |
| 110              | 1.4728                                                                                                | 1.4659 | 1.4611  | 1.4543 | 1.4498 |
| 100              | 1.4744                                                                                                | 1.4669 | 1.4611  | 1.4550 | 1.4515 |
| 90               | 1.4751                                                                                                | 1.4684 | 1.4637  | 1.4575 | 1.4528 |
| 80               | 1.4761                                                                                                | 1.4699 | 1.4644  | 1.4592 | 1.4544 |
| Temperature (°C) | Measured refractive index for [C <sub>1</sub> C <sub>4</sub> im][(MeO) <sub>2</sub> PO <sub>2</sub> ] |        |         |        |        |
|                  | 450nm                                                                                                 | 532nm  | 632.8nm | 964nm  | 1551nm |
| 160              | 1.4568                                                                                                | 1.4490 | 1.4444  | 1.4378 | 1.4343 |
| 150              | 1.4593                                                                                                | 1.4517 | 1.4463  | 1.4397 | 1.4363 |
| 140              | 1.4603                                                                                                | 1.4521 | 1.4466  | 1.4405 | 1.4366 |
| 130              | 1.4622                                                                                                | 1.4541 | 1.4498  | 1.4432 | 1.4396 |
| 120              | 1.4643                                                                                                | 1.4569 | 1.4508  | 1.4445 | 1.4417 |
| 110              | 1.4663                                                                                                | 1.4589 | 1.4538  | 1.4472 | 1.4439 |
| 100              | 1.4691                                                                                                | 1.4618 | 1.4555  | 1.4484 | 1.4462 |
| 90               | 1.4712                                                                                                | 1.4642 | 1.4581  | 1.4509 | 1.4482 |
| 80               | 1.4735                                                                                                | 1.4664 | 1.4612  | 1.4544 | 1.4507 |
| Temperature (°C) | Measured refractive index for [C <sub>1</sub> C <sub>6</sub> im][(MeO) <sub>2</sub> PO <sub>2</sub> ] |        |         |        |        |
|                  | 450nm                                                                                                 | 532nm  | 632.8nm | 964nm  | 1551nm |
| 160              | 1.4374                                                                                                | 1.4319 | 1.4274  | 1.4211 | 1.4180 |
| 150              | 1.4389                                                                                                | 1.4330 | 1.4285  | 1.4225 | 1.4188 |
| 140              | 1.4412                                                                                                | 1.4355 | 1.4306  | 1.4246 | 1.4205 |
| 130              | 1.4435                                                                                                | 1.4375 | 1.4327  | 1.4269 | 1.4228 |
| 120              | 1.4460                                                                                                | 1.4396 | 1.4352  | 1.4290 | 1.4249 |
| 110              | 1.4485                                                                                                | 1.4415 | 1.4373  | 1.4313 | 1.4272 |
| 100              | 1.4509                                                                                                | 1.4443 | 1.4398  | 1.4334 | 1.4291 |
| 90               | 1.4534                                                                                                | 1.4470 | 1.4423  | 1.4360 | 1.4315 |
| 80               | 1.4561                                                                                                | 1.4494 | 1.4446  | 1.4381 | 1.4338 |
| Temperature (°C) | Measured refractive index for [C <sub>1</sub> C <sub>1</sub> im][MeMeOPO <sub>2</sub> ]               |        |         |        |        |
|                  | 450nm                                                                                                 | 532nm  | 632.8nm | 964nm  | 1551nm |
| 160              | 1.4885                                                                                                | 1.4830 | 1.4787  | 1.4720 | 1.4675 |
| 150              | 1.4882                                                                                                | 1.4814 | 1.4770  | 1.4704 | 1.4664 |
| 140              | 1.4870                                                                                                | 1.4796 | 1.4747  | 1.4692 | 1.4660 |
| 130              | 1.4854                                                                                                | 1.4780 | 1.4732  | 1.4678 | 1.4640 |
| 120              | 1.4834                                                                                                | 1.4746 | 1.4706  | 1.4661 | 1.4623 |
| 110              | 1.4815                                                                                                | 1.4741 | 1.4693  | 1.4643 | 1.4603 |
| 100              | 1.4796                                                                                                | 1.4710 | 1.4665  | 1.4626 | 1.4586 |
| 90               | 1.4782                                                                                                | 1.4699 | 1.4649  | 1.4607 | 1.4572 |
| 80               | 1.4761                                                                                                | 1.4663 | 1.4627  | 1.4589 | 1.4551 |
| Temperature (°C) | Measured refractive index for [C <sub>1</sub> C <sub>4</sub> im][MeMeOPO <sub>2</sub> ]               |        |         |        |        |
|                  | 450nm                                                                                                 | 532nm  | 632.8nm | 964nm  | 1551nm |
| 160              | 1.4633                                                                                                | 1.4561 | 1.4504  | 1.4437 | 1.4398 |
| 150              | 1.4652                                                                                                | 1.4583 | 1.4528  | 1.4455 | 1.4419 |
| 140              | 1.4671                                                                                                | 1.4602 | 1.4547  | 1.4469 | 1.4427 |
| 130              | 1.4691                                                                                                | 1.4618 | 1.4567  | 1.4493 | 1.4452 |
| 120              | 1.4709                                                                                                | 1.4636 | 1.4583  | 1.4506 | 1.4466 |
| 110              | 1.4729                                                                                                | 1.4653 | 1.4602  | 1.4533 | 1.4492 |
| 100              | 1.4743                                                                                                | 1.4675 | 1.4623  | 1.4552 | 1.4512 |
| 90               | 1.4757                                                                                                | 1.4687 | 1.4636  | 1.4571 | 1.4530 |
| 80               | 1.4775                                                                                                | 1.4708 | 1.4651  | 1.4594 | 1.4554 |
| Temperature (°C) | Measured refractive index for [C <sub>1</sub> C <sub>6</sub> im][MeMeOPO <sub>2</sub> ]               |        |         |        |        |
|                  | 450nm                                                                                                 | 532nm  | 632.8nm | 964nm  | 1551nm |
| 160              | 1.4566                                                                                                | 1.4489 | 1.4435  | 1.4364 | 1.4333 |
| 150              | 1.4597                                                                                                | 1.4514 | 1.4455  | 1.4388 | 1.4353 |
| 140              | 1.4613                                                                                                | 1.4524 | 1.4466  | 1.4395 | 1.4371 |
| 130              | 1.4642                                                                                                | 1.4553 | 1.4495  | 1.4429 | 1.4391 |
| 120              | 1.4667                                                                                                | 1.4583 | 1.4516  | 1.4447 | 1.4405 |
| 110              | 1.4688                                                                                                | 1.4602 | 1.4543  | 1.4479 | 1.4431 |
| 100              | 1.4712                                                                                                | 1.4630 | 1.4558  | 1.4489 | 1.4445 |
| 90               | 1.4736                                                                                                | 1.4645 | 1.4583  | 1.4513 | 1.4468 |

|                  |                                                                                        |        |         |        |        |
|------------------|----------------------------------------------------------------------------------------|--------|---------|--------|--------|
| 80               | 1.4759                                                                                 | 1.4669 | 1.4611  | 1.4549 | 1.4503 |
| Temperature (°C) | Measured refractive index for [C <sub>1</sub> C <sub>1</sub> im][MeOHPO <sub>2</sub> ] |        |         |        |        |
|                  | 450nm                                                                                  | 532nm  | 632.8nm | 964nm  | 1551nm |
| 160              | 1.4781                                                                                 | 1.4704 | 1.4647  | 1.4578 | 1.4529 |
| 150              | 1.4792                                                                                 | 1.4712 | 1.4656  | 1.4584 | 1.4537 |
| 140              | 1.4805                                                                                 | 1.4729 | 1.4673  | 1.4601 | 1.4556 |
| 130              | 1.4825                                                                                 | 1.474  | 1.4691  | 1.462  | 1.4569 |
| 120              | 1.4843                                                                                 | 1.4762 | 1.471   | 1.4634 | 1.4583 |
| 110              | 1.486                                                                                  | 1.477  | 1.4726  | 1.465  | 1.4597 |
| 100              | 1.4876                                                                                 | 1.4783 | 1.4743  | 1.4663 | 1.4607 |
| 90               | 1.489                                                                                  | 1.4797 | 1.4757  | 1.4674 | 1.4619 |
| 80               | 1.4899                                                                                 | 1.4811 | 1.4769  | 1.4689 | 1.4633 |
| Temperature (°C) | Measured refractive index for [C <sub>1</sub> C <sub>4</sub> im][MeOHPO <sub>2</sub> ] |        |         |        |        |
|                  | 450nm                                                                                  | 532nm  | 632.8nm | 964nm  | 1551nm |
| 160              | 1.4756                                                                                 | 1.4691 | 1.4648  | 1.4595 | 1.4534 |
| 150              | 1.4762                                                                                 | 1.4699 | 1.4653  | 1.4598 | 1.4549 |
| 140              | 1.4783                                                                                 | 1.4708 | 1.4672  | 1.4601 | 1.4566 |
| 130              | 1.4798                                                                                 | 1.4725 | 1.4678  | 1.4615 | 1.4582 |
| 120              | 1.4811                                                                                 | 1.4743 | 1.4716  | 1.4636 | 1.4595 |
| 110              | 1.4830                                                                                 | 1.4756 | 1.4719  | 1.4651 | 1.4615 |
| 100              | 1.4849                                                                                 | 1.4793 | 1.4749  | 1.4679 | 1.4635 |
| 90               | 1.4887                                                                                 | 1.4800 | 1.4776  | 1.4690 | 1.4654 |
| 80               | 1.4899                                                                                 | 1.4818 | 1.4792  | 1.4718 | 1.4672 |
| Temperature (°C) | Measured refractive index for [C <sub>1</sub> C <sub>6</sub> im][MeOHPO <sub>2</sub> ] |        |         |        |        |
|                  | 450nm                                                                                  | 532nm  | 632.8nm | 964nm  | 1551nm |
| 160              | 1.4676                                                                                 | 1.4605 | 1.4545  | 1.4483 | 1.4429 |
| 150              | 1.4693                                                                                 | 1.4622 | 1.4563  | 1.4499 | 1.4448 |
| 140              | 1.4709                                                                                 | 1.4646 | 1.4573  | 1.4518 | 1.4457 |
| 130              | 1.4730                                                                                 | 1.4664 | 1.4596  | 1.4539 | 1.4478 |
| 120              | 1.4750                                                                                 | 1.4675 | 1.4614  | 1.4548 | 1.4491 |
| 110              | 1.4768                                                                                 | 1.4694 | 1.4631  | 1.4567 | 1.4510 |
| 100              | 1.4789                                                                                 | 1.4711 | 1.4651  | 1.4583 | 1.4524 |
| 90               | 1.4810                                                                                 | 1.4734 | 1.4669  | 1.4606 | 1.4543 |
| 80               | 1.4829                                                                                 | 1.4759 | 1.4692  | 1.4625 | 1.4567 |
